# Supplementary material for: Prospective Proteomic Study Identifies Potential Circulating Protein Biomarkers for Colorectal Cancer Risk
Source: MDPI journal article supplement (doi:10.3390/cancers14133261), 2022-07-03
Supplement: s1 [file s1]

## Supplemental Content

**Supplementary Figure S1.** Scatter plot for the first two principal components of the quality control and cohort samples.

**Supplementary Figure S2.** Age-adjusted Spearman correlation coefficients of 6 risk-associated proteins.

\* $P < 0.05$

**Supplementary Table S1.** The inter-assay coefficient of variation for all proteins analyzed in the discovery set.

**Supplementary Table S2.** The inter-assay coefficient of variation for the 27 proteins tested in the validation set.

**Supplementary Table S3.** The comparison of host characteristics between the individuals involved in the discovery and validation set.

**Supplementary Table S4.** The associations between CRC risk and selected dichotomized protein markers.

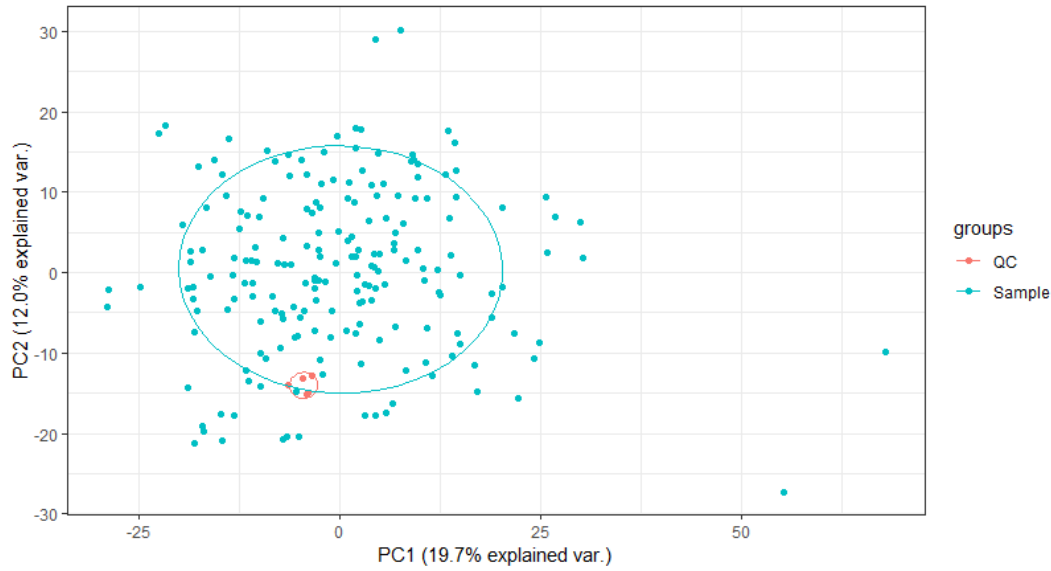

**Figure S1.** Scatter plot for the first two principal components of the quality control and cohort samples.

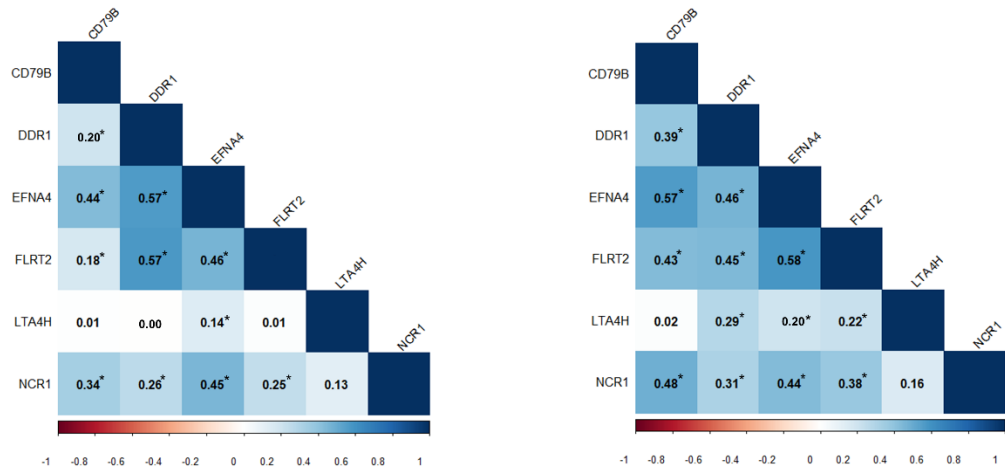

**Figure S2.** Age-adjusted Spearman correlation coefficients of 6 risk-associated proteins. \* $P < 0.05$

**Table S1.** The inter-assay coefficient of variation for all proteins analyzed in the discovery set.

| Proteins                                                       | Gene    | CV    |
|----------------------------------------------------------------|---------|-------|
| Alanyl-tRNA editing protein Aarsd1                             | AARSD1  | 15.73 |
| Protein ABHD14B                                                | ABHD14B | 21.87 |
| Tyrosine-protein kinase ABL1                                   | ABL1    | 8.37  |
| Aggrecan core protein                                          | ACAN    | 7.59  |
| Angiotensin-converting enzyme 2                                | ACE2    | 6.41  |
| Lysophosphatidic acid phosphatase type 6                       | ACP6    | 14.05 |
| Adenosine Deaminase                                            | ADA     | 5.36  |
| Disintegrin and metalloproteinase domain-containing protein 15 | ADAM15  | 15.49 |

|                                                                                 |              |       |
|---------------------------------------------------------------------------------|--------------|-------|
| Disintegrin and metalloproteinase domain-containing protein 22                  | ADAM 22      | 9.75  |
| Disintegrin and metalloproteinase domain-containing protein 23                  | ADAM 23      | 13.56 |
| Disintegrin and metalloproteinase domain-containing protein 8                   | ADAM8        | 7.23  |
| A disintegrin and metalloproteinase with thrombospondin motifs 13               | ADAM-TS13    | 3.00  |
| A disintegrin and metalloproteinase with thrombospondin motifs 15               | ADAM-TS 15   | 9.62  |
| Adhesion G protein-coupled receptor E2                                          | ADGRE2       | 12.68 |
| Adhesion G-protein coupled receptor G1                                          | ADGRG1       | 8.25  |
| Adhesion G-protein coupled receptor G2                                          | ADGRG2       | 11.30 |
| ADM                                                                             | ADM          | 4.59  |
| Anterior gradient protein 2 homolog                                             | AGR2         | 15.34 |
| Anterior gradient protein 3                                                     | AGR3         | 17.02 |
| Agouti-related protein                                                          | AGRP         | 9.05  |
| Adenosylhomocysteinase                                                          | AHCY         | 10.52 |
| Apoptosis-inducing factor 1, mitochondrial                                      | AIFM1        | 26.97 |
| Proline-rich AKT1 substrate 1                                                   | AKT1S1       | 16.29 |
| CD166 antigen                                                                   | ALCAM        | 8.14  |
| Retinal dehydrogenase 1                                                         | ALDH1A1      | 9.96  |
| Aldehyde dehydrogenase, dimeric NADP-preferring                                 | ALDH3A1      | 10.49 |
| Alpha-2-macroglobulin receptor-associated protein                               | Alpha-2-MRAP | 12.87 |
| Protein AMBP                                                                    | AMBP         | 4.13  |
| Amphoterin-induced protein 2                                                    | AMIGO2       | 13.62 |
| Protein amnionless                                                              | AMN          | 16.56 |
| Angiogenin                                                                      | ANG          | 29.45 |
| Angiopoietin-2                                                                  | ANGPT2       | 6.73  |
| Angiopoietin-related protein 1                                                  | ANGPTL1      | 6.70  |
| Angiopoietin-related protein 3                                                  | ANGPTL3      | 32.27 |
| Angiopoietin-related protein 4                                                  | ANGPTL4      | 11.12 |
| Angiopoietin-related protein 7                                                  | ANGPTL7      | 5.43  |
| Annexin A1                                                                      | ANXA1        | 7.55  |
| Annexin A10                                                                     | ANXA10       | 11.12 |
| Annexin A11                                                                     | ANXA11       | 21.63 |
| Annexin A4                                                                      | ANXA4        | 0.00  |
| Amiloride-sensitive amine oxidase (copper-containing)                           | AOC1         | 6.73  |
| Membrane primary amine oxidase                                                  | AOC3         | 33.84 |
| Amyloid beta A4 precursor protein-binding family B member 1-interacting protein | APBB1IP      | 18.54 |
| DNA-(apurinic or apyrimidinic site) lyase                                       | APEX1        | 10.19 |
| Amyloid-like protein 1                                                          | APLP1        | 7.88  |
| Aminopeptidase N                                                                | AP-N         | 7.37  |
| Apolipoprotein M                                                                | APOM         | 39.66 |
| Amyloid beta A4 protein                                                         | APP          | 9.29  |

|                                                        |               |        |
|--------------------------------------------------------|---------------|--------|
| Amphiregulin                                           | AREG          | 7.17   |
| Arginase-1                                             | ARG1          | 101.17 |
| Rho GTPase-activating protein 1                        | ARHGAP1       | 15.48  |
| Rho guanine nucleotide exchange factor 12              | ARHGEF12      | 20.69  |
| Aryl hydrocarbon receptor nuclear translocator         | ARNT          | 0.00   |
| Arylsulfatase A                                        | ARSA          | 11.93  |
| Arylsulfatase B                                        | ARSB          | 9.29   |
| Artemin                                                | ARTN          | 3.34   |
| Asialoglycoprotein receptor 1                          | ASGR1         | 14.62  |
| Cysteine protease ATG4A                                | ATG4A         | 11.52  |
| Renin receptor                                         | ATP6AP2       | 17.86  |
| V-type proton ATPase subunit F                         | ATP6V1F       | 16.64  |
| Axin-1                                                 | AXIN1         | 18.98  |
| Tyrosine-protein kinase receptor UFO                   | AXL           | 9.96   |
| Azurocidin                                             | AZU1          | 51.78  |
| Beta-1,4-galactosyltransferase 1                       | B4GALT1       | 4.87   |
| Beta-1,4-glucuronyltransferase 1                       | B4GAT1        | 10.61  |
| Transcription regulator protein BACH1                  | BACH1         | 8.13   |
| Large proline-rich protein BAG6                        | BAG6          | 26.77  |
| BMP and activin membrane-bound inhibitor homolog       | BAMBI         | 25.34  |
| B-cell scaffold protein with ankyrin repeats           | BANK1         | 13.48  |
| Basal cell adhesion molecule                           | BCAM          | 6.10   |
| Brevican core protein                                  | BCAN          | 10.12  |
| Bcl-2-like protein 11 isoform BimL                     | BCL2L11       | 13.26  |
| Breakpoint cluster region protein                      | BCR           | 24.40  |
| Beta-nerve growth factor                               | Beta-NGF      | 1.25   |
| Biglycan                                               | BGN           | 5.87   |
| BH3-interacting domain death agonist                   | BID           | 26.45  |
| Baculoviral IAP repeat-containing protein 2            | BIRC2         | 0.00   |
| Bleomycin hydrolase                                    | BLM hydrolase | 9.04   |
| Flavin reductase NADPH                                 | BLVRB         | 18.26  |
| Bone morphogenetic protein 4                           | BMP-4         | 5.87   |
| Bone morphogenetic protein 6                           | BMP-6         | 23.41  |
| Natriuretic peptides B                                 | BNP           | 0.00   |
| Brother of CDO                                         | BOC           | 6.00   |
| ADP-ribosyl cyclase/cyclic ADP-ribose hydrolase 2      | BST1          | 6.39   |
| Bone marrow stromal antigen 2                          | BST2          | 14.39  |
| Probetacellulin                                        | BTC           | 33.56  |
| Butyrophilin subfamily 3 member A2                     | BTN3A2        | 11.80  |
| Complement C1q tumor necrosis factor-related protein 1 | C1QTNF1       | 42.69  |
| Complement C2                                          | C2            | 36.58  |

|                                                      |         |       |
|------------------------------------------------------|---------|-------|
| Carbonic anhydrase 1                                 | CA1     | 33.11 |
| Carbonic anhydrase 12                                | CA12    | 12.46 |
| Carbonic anhydrase 13                                | CA13    | 5.11  |
| Carbonic anhydrase 14                                | CA14    | 15.47 |
| Carbonic anhydrase 2                                 | CA2     | 15.50 |
| Carbonic anhydrase 3                                 | CA3     | 27.77 |
| Carbonic anhydrase 4                                 | CA4     | 26.88 |
| Carbonic anhydrase 5A, mitochondrial                 | CA5A    | 7.93  |
| Carbonic anhydrase 6                                 | CA6     | 9.93  |
| Cell adhesion molecule 3                             | CADM3   | 15.66 |
| Carbonic anhydrase IX                                | CAIX    | 13.25 |
| Calcitonin                                           | CALCA   | 21.05 |
| Calreticulin                                         | CALR    | 25.41 |
| Calcium/calmodulin-dependent protein kinase kinase 1 | CAMKK1  | 7.54  |
| Soluble calcium-activated nucleotidase 1             | CANT1   | 6.20  |
| Macrophage-capping protein                           | CAPG    | 26.22 |
| Calcium-regulated heat-stable protein 1              | CARHSP1 | 17.54 |
| Caspase-3                                            | CASP-3  | 39.64 |
| Caspase-8                                            | CASP-8  | 12.41 |
| E3 ubiquitin-protein ligase CBL                      | CBL     | 22.01 |
| Coiled-coil domain-containing protein 80             | CCDC80  | 11.92 |
| Eotaxin                                              | CCL11   | 6.28  |
| C-C motif chemokine 14                               | CCL14   | 29.93 |
| C-C motif chemokine 15                               | CCL15   | 14.56 |
| C-C motif chemokine 16                               | CCL16   | 12.38 |
| C-C motif chemokine 17                               | CCL17   | 12.23 |
| C-C motif chemokine 18                               | CCL18   | 32.70 |
| C-C motif chemokine 19                               | CCL19   | 12.04 |
| C-C motif chemokine 20                               | CCL20   | 13.52 |
| C-C motif chemokine 21                               | CCL21   | 9.48  |
| C-C motif chemokine 23                               | CCL23   | 14.96 |
| C-C motif chemokine 24                               | CCL24   | 10.89 |
| C-C motif chemokine 25                               | CCL25   | 12.51 |
| C-C motif chemokine 27                               | CCL27   | 25.70 |
| C-C motif chemokine 28                               | CCL28   | 13.22 |
| C-C motif chemokine 3                                | CCL3    | 16.04 |
| C-C motif chemokine 4                                | CCL4    | 12.81 |
| C-C motif chemokine 5                                | CCL5    | 29.07 |
| CD109 antigen                                        | CD109   | 15.39 |
| CD160 antigen                                        | CD160   | 9.39  |
| Scavenger receptor cysteine-rich type 1 protein M130 | CD163   | 9.18  |

|                                                               |         |        |
|---------------------------------------------------------------|---------|--------|
| Sialomucin core protein 24                                    | CD164   | 10.80  |
| CD177 antigen                                                 | CD177   | 16.55  |
| T-cell surface glycoprotein CD1c                              | CD1C    | 4.78   |
| OX-2 membrane glycoprotein                                    | CD200   | 10.18  |
| Cell surface glycoprotein CD200 receptor 1                    | CD200R1 | 5.83   |
| C-type lectin domain family 4 member K                        | CD207   | 10.19  |
| CD209 antigen                                                 | CD209   | 7.16   |
| Natural killer cell receptor 2B4                              | CD244   | 11.44  |
| CD27 antigen                                                  | CD27    | 7.50   |
| T-cell-specific surface glycoprotein CD28                     | CD28    | 0.00   |
| CD2-associated protein                                        | CD2AP   | 105.21 |
| CMRF35-like molecule 9                                        | CD300LG | 6.02   |
| CD302 antigen                                                 | CD302   | 15.02  |
| Myeloid cell surface antigen CD33                             | CD33    | 17.57  |
| ADP-ribosyl cyclase/cyclic ADP-ribose hydrolase 1             | CD38    | 11.34  |
| T-cell surface glycoprotein CD4                               | CD4     | 3.63   |
| CD40L receptor                                                | CD40    | 13.29  |
| CD40 ligand                                                   | CD40-L  | 24.21  |
| Membrane cofactor protein                                     | CD46    | 34.41  |
| CD48 antigen                                                  | CD48    | 5.53   |
| T-cell surface glycoprotein CD5                               | CD5     | 11.02  |
| Lymphocyte function-associated antigen 3                      | CD58    | 11.94  |
| CD59 glycoprotein                                             | CD59    | 18.90  |
| T cell surface glycoprotein CD6 isoform                       | CD6     | 20.93  |
| CD63 antigen                                                  | CD63    | 19.42  |
| Early activation antigen CD69                                 | CD69    | 20.29  |
| CD70 antigen                                                  | CD70    | 14.36  |
| HLA class II histocompatibility antigen gamma chain           | CD74    | 14.08  |
| B-cell antigen receptor complex-associated protein beta chain | CD79B   | 5.25   |
| CD83 antigen                                                  | CD83    | 7.79   |
| SLAM family member 5                                          | CD84    | 4.31   |
| T-cell surface glycoprotein CD8 alpha chain                   | CD8A    | 16.76  |
| Complement component C1q receptor                             | CD93    | 8.46   |
| CD97 antigen                                                  | CD97    | 13.67  |
| CD99 antigen-like protein 2                                   | CD99L2  | 9.82   |
| CUB domain-containing protein 1                               | CDCP1   | 13.85  |
| Cadherin-1                                                    | CDH1    | 34.85  |
| Cadherin-15                                                   | CDH15   | 30.05  |
| Cadherin-17                                                   | CDH17   | 17.18  |
| Cadherin-2                                                    | CDH2    | 4.35   |
| Cadherin-3                                                    | CDH3    | 10.11  |

|                                                            |         |       |
|------------------------------------------------------------|---------|-------|
| Cadherin-5                                                 | CDH5    | 9.54  |
| Cadherin-6                                                 | CDH6    | 7.72  |
| Cadherin-related family member 5                           | CDHR5   | 6.53  |
| Cyclin-dependent kinase inhibitor 1                        | CDKN1A  | 5.00  |
| Cerebral dopamine neurotrophic factor                      | CDNF    | 1.15  |
| Cell adhesion molecule-related/down-regulated by oncogenes | CDON    | 12.05 |
| Corneodesmosin                                             | CDSN    | 88.62 |
| Carcinoembryonic antigen-related cell adhesion molecule 1  | CEACAM1 | 5.80  |
| Carcinoembryonic antigen-related cell adhesion molecule 3  | CEACAM3 | 0.00  |
| Carcinoembryonic antigen                                   | CEA     | 9.06  |
| Carcinoembryonic antigen-related cell adhesion molecule 8  | CEACAM8 | 24.08 |
| Liver carboxylesterase 1                                   | CES1    | 23.17 |
| Cocaine esterase                                           | CES2    | 51.63 |
| Centrin-2                                                  | CETN2   | 8.57  |
| Cryptic protein                                            | CFC1    | 6.09  |
| Complement factor H-related protein 5                      | CFHR5   | 36.31 |
| Glycoprotein hormones alpha chain                          | CGA     | 11.91 |
| Chitinase-3-like protein 1                                 | CHI3L1  | 8.81  |
| Chitotriosidase-1                                          | CHIT1   | 29.03 |
| Neural cell adhesion molecule L1-like protein              | CHL1    | 33.86 |
| Chordin-like protein 2                                     | CHRD12  | 7.07  |
| Cytoskeleton-associated protein 4                          | CKAP4   | 17.79 |
| C-type lectin domain family 10 member A                    | CLEC10A | 7.99  |
| C-type lectin domain family 11 member A                    | CLEC11A | 9.88  |
| C-type lectin domain family 14 member A                    | CLEC14A | 11.47 |
| C-type lectin domain family 1 member A                     | CLEC1A  | 14.40 |
| C-type lectin domain family 1 member B                     | CLEC1B  | 15.70 |
| C-type lectin domain family 4 member A                     | CLEC4A  | 6.42  |
| C-type lectin domain family 4 member C                     | CLEC4C  | 4.53  |
| C-type lectin domain family 4 member D                     | CLEC4D  | 6.58  |
| C-type lectin domain family 4 member G                     | CLEC4G  | 6.12  |
| C-type lectin domain family 5 member A                     | CLEC5A  | 36.86 |
| C-type lectin domain family 6 member A                     | CLEC6A  | 9.26  |
| C-type lectin domain family 7 member A                     | CLEC7A  | 10.23 |
| CMRF35-like molecule 1                                     | CLM-1   | 11.57 |
| CMRF35-like molecule 6                                     | CLM-6   | 5.53  |
| CXADR-like membrane protein                                | CLMP    | 10.84 |
| Claspin                                                    | CLSPN   | 0.00  |
| Calsyntenin-1                                              | CLSTN1  | 10.80 |
| Calsyntenin-2                                              | CLSTN2  | 5.12  |
| Calsyntenin-3                                              | CLSTN3  | 15.46 |

|                                                |          |       |
|------------------------------------------------|----------|-------|
| Clusterin-like protein 1                       | CLUL1    | 6.34  |
| Beta-Ala-His dipeptidase                       | CNDP1    | 31.57 |
| Contactin-1                                    | CNTN1    | 8.70  |
| Contactin-2                                    | CNTN2    | 19.63 |
| Contactin-4                                    | CNTN4    | 4.47  |
| Contactin-5                                    | CNTN5    | 9.31  |
| Contactin-associated protein-like 2            | CNTNAP2  | 4.45  |
| Cochlin                                        | COCH     | 14.96 |
| Collagen alpha-1(XVIII) chain                  | COL18A1  | 33.42 |
| Collagen alpha-1(I) chain                      | COL1A1   | 10.09 |
| Collagen alpha-1(IV) chain                     | COL4A1   | 21.59 |
| Collagen type IV alpha-3-binding protein       | COL4A3BP | 14.22 |
| Collectin-12                                   | COLEC12  | 10.48 |
| Cartilage oligomeric matrix protein            | COMP     | 43.95 |
| Catechol O-methyltransferase                   | COMT     | 22.81 |
| Carboxypeptidase A1                            | CPA1     | 7.74  |
| Carboxypeptidase A2                            | CPA2     | 9.17  |
| Carboxypeptidase B                             | CPB1     | 7.25  |
| Carboxypeptidase E                             | CPE      | 13.11 |
| Carboxypeptidase M                             | CPM      | 5.43  |
| Probable carboxypeptidase X1                   | CPXM1    | 19.28 |
| Complement receptor type 2                     | CR2      | 50.24 |
| Death domain-containing protein                | CRADD    | 17.91 |
| Cysteine-rich with EGF-like domain protein 2   | CRELD2   | 9.62  |
| Corticoliberin                                 | CRH      | 18.39 |
| Corticotropin-releasing factor-binding protein | CRHBP    | 6.89  |
| Cysteine-rich motor neuron 1 protein           | CRIM1    | 12.35 |
| Cysteine-rich protein 2                        | CRIP2    | 14.35 |
| Cysteine-rich secretory protein 2              | CRISP2   | 20.30 |
| Crk-like protein                               | CRKL     | 34.34 |
| Cornulin                                       | CRNN     | 7.60  |
| Cartilage acidic protein 1                     | CRTAC1   | 39.68 |
| Cytotoxic and regulatory T-cell molecule       | CRTAM    | 11.67 |
| Cone-rod homeobox protein                      | CRX      | 19.26 |
| Macrophage colony-stimulating factor 1         | CSF-1    | 5.95  |
| Casein kinase I isoform delta                  | CSNK1D   | 11.88 |
| Cystatin-C                                     | CST3     | 35.52 |
| Cystatin D                                     | CST5     | 6.60  |
| Cystatin-M                                     | CST6     | 10.31 |
| Cystatin-B                                     | CSTB     | 7.93  |
| Cardiotrophin-1                                | CTF1     | 0.00  |



|                                                                               |        |       |
|-------------------------------------------------------------------------------|--------|-------|
| Chymotrypsin C                                                                | CTRC   | 8.73  |
| Dipeptidyl peptidase 1                                                        | CTSC   | 17.96 |
| Cathepsin D                                                                   | CTSD   | 7.38  |
| Cathepsin F                                                                   | CTSF   | 12.50 |
| Pro-cathepsin H                                                               | CTSH   | 5.73  |
| Cathepsin L1                                                                  | CTSL1  | 1.85  |
| Cathepsin O                                                                   | CTSO   | 4.57  |
| Cathepsin S                                                                   | CTSS   | 2.69  |
| Cathepsin L2                                                                  | CTSV   | 7.58  |
| Cathepsin Z                                                                   | CTSZ   | 8.36  |
| Fractalkine                                                                   | CX3CL1 | 5.30  |
| Coxsackievirus and adenovirus receptor                                        | CXADR  | 7.06  |
| C-X-C motif chemokine 1                                                       | CXCL1  | 6.63  |
| C-X-C motif chemokine 10                                                      | CXCL10 | 15.78 |
| C-X-C motif chemokine 11                                                      | CXCL11 | 17.64 |
| Stromal cell-derived factor 1                                                 | CXCL12 | 10.12 |
| C-X-C motif chemokine 13                                                      | CXCL13 | 6.75  |
| C-X-C motif chemokine 16                                                      | CXCL16 | 8.17  |
| C-X-C motif chemokine 5                                                       | CXCL5  | 11.31 |
| C-X-C motif chemokine 6                                                       | CXCL6  | 11.71 |
| C-X-C motif chemokine 9                                                       | CXCL9  | 12.39 |
| VEGF-co regulated chemokine 1                                                 | CXL17  | 14.21 |
| Protein CYR61                                                                 | CYR61  | 10.86 |
| Disabled homolog 2                                                            | DAB2   | 56.73 |
| Dystroglycan                                                                  | DAG1   | 10.68 |
| Dual adapter for phosphotyrosine and 3-phosphotyrosine and 3-phosphoinositide | DAPP1  | 11.85 |
| Discoidin, CUB and LCCL domain-containing protein 2                           | DCBLD2 | 6.97  |
| Decorin                                                                       | DCN    | 6.29  |
| Dynactin subunit 1                                                            | DCTN1  | 13.73 |
| Dynactin subunit 2                                                            | DCTN2  | 25.33 |
| N(G),N(G)-dimethylarginine dimethylaminohydrolase 1                           | DDAH1  | 9.01  |
| Aromatic-L-amino-acid decarboxylase                                           | DDC    | 3.73  |
| Epithelial discoidin domain-containing receptor 1                             | DDR1   | 6.99  |
| Probable ATP-dependent RNA helicase DDX58                                     | DDX58  | 9.94  |
| 2,4-dienoyl-CoA reductase, mitochondrial                                      | DECR1  | 84.85 |
| Neutrophil defensin 1                                                         | DEFA1  | 3.63  |
| Beta-defensin 4A                                                              | DEFB4A | 44.75 |
| DNA fragmentation factor subunit alpha                                        | DFFA   | 6.17  |
| Diacylglycerol kinase zeta                                                    | DGKZ   | 0.00  |
| Diablo homolog, mitochondrial                                                 | DIABLO | 35.44 |

|                                                                               |         |       |
|-------------------------------------------------------------------------------|---------|-------|
| Dickkopf-related protein 1                                                    | Dkk-1   | 9.75  |
| Dickkopf-related protein 3                                                    | DKK3    | 12.34 |
| Dickkopf-related protein 4                                                    | Dkk-4   | 8.19  |
| Dickkopf-like protein 1                                                       | DKKL1   | 8.52  |
| Protein delta homolog 1                                                       | DLK-1   | 10.66 |
| Delta-like protein 1                                                          | DLL1    | 8.34  |
| DnaJ homolog subfamily B member 1                                             | DNAJB1  | 22.30 |
| Delta and Notch-like epidermal growth factor-related receptor                 | DNER    | 5.97  |
| Dipeptidase 1                                                                 | DPEP1   | 19.31 |
| Dipeptidase 2                                                                 | DPEP2   | 12.15 |
| Inactive dipeptidyl peptidase 10                                              | DPP10   | 3.24  |
| Dipeptidyl peptidase 4                                                        | DPP4    | 36.47 |
| Dipeptidyl aminopeptidase-like protein 6                                      | DPP6    | 12.47 |
| Dipeptidyl peptidase 2                                                        | DPP7    | 14.14 |
| Draxin                                                                        | DRAXIN  | 10.22 |
| Desmocollin-2                                                                 | DSC2    | 11.89 |
| Desmoglein-3                                                                  | DSG3    | 13.83 |
| Desmoglein-4                                                                  | DSG4    | 20.98 |
| Dual specificity protein phosphatase 3                                        | DUSP3   | 11.08 |
| Endothelin-converting enzyme 1                                                | ECE1    | 16.91 |
| Tumor necrosis factor receptor superfamily member 27                          | EDA2R   | 12.12 |
| Tumor necrosis factor receptor superfamily member EDAR                        | EDAR    | 9.15  |
| EGF-like repeat and discoidin I-like domain-containing protein 3              | EDIL3   | 7.92  |
| EGF-containing fibulin-like extracellular matrix protein 1                    | EFEMP1  | 43.56 |
| Ephrin-A4                                                                     | EFNA4   | 9.18  |
| Pro-epidermal growth factor                                                   | EGF     | 5.83  |
| Epidermal growth factor-like protein 7                                        | EGFL7   | 23.12 |
| Epidermal growth factor receptor                                              | EGFR    | 9.10  |
| Egl nine homolog 1                                                            | EGLN1   | 10.67 |
| Eukaryotic translation initiation factor 4B                                   | EIF4B   | 15.17 |
| Eukaryotic translation initiation factor 4 gamma 1                            | EIF4G1  | 10.35 |
| Eukaryotic translation initiation factor 5A-1                                 | EIF5A   | 0.00  |
| Protein enabled homolog                                                       | ENAH    | 18.64 |
| Endoglin                                                                      | ENG     | 29.37 |
| Gamma-enolase                                                                 | ENO2    | 12.95 |
| Ectonucleotide pyrophosphatase/phosphodiesterase family member 2 or Autotaxin | ENPP2   | 9.61  |
| Ectonucleotide pyrophosphatase/phosphodiesterase family member 7              | ENPP7   | 8.42  |
| Protein S100-A12                                                              | EN-RAGE | 4.50  |
| Ectonucleoside triphosphate diphosphohydrolase 2                              | ENTPD2  | 14.58 |
| Ectonucleoside triphosphate diphosphohydrolase 5                              | ENTPD5  | 11.68 |

|                                                            |            |       |
|------------------------------------------------------------|------------|-------|
| Ectonucleoside triphosphate diphosphohydrolase 6           | ENTPD6     | 13.43 |
| Epithelial cell adhesion molecule                          | Ep-CAM     | 12.71 |
| Ephrin type-A receptor 10                                  | EPHA10     | 0.00  |
| Ephrin type-A receptor 2                                   | EPHA2      | 9.43  |
| Ephrin type-B receptor 4                                   | EPHB4      | 8.82  |
| Ephrin type-B receptor 6                                   | EPHB6      | 8.87  |
| Erythropoietin                                             | EPO        | 5.25  |
| Receptor tyrosine-protein kinase erbB-2                    | ErbB2/HER2 | 7.15  |
| Erbin                                                      | ERBIN      | 21.71 |
| Receptor tyrosine-protein kinase erbB-3                    | ErbB3/HER3 | 9.50  |
| Receptor tyrosine-protein kinase erbB-4                    | ErbB4/HER4 | 7.78  |
| Proepiregulin                                              | EREG       | 6.85  |
| Endothelial cell-selective adhesion molecule               | ESAM       | 9.30  |
| Endothelial cell-specific molecule 1                       | ESM-1      | 12.30 |
| Ezrin                                                      | EZR        | 12.17 |
| Coagulation factor XI                                      | F11        | 36.78 |
| Coagulation factor VII                                     | F7         | 33.74 |
| Fatty acid-binding protein, intestinal                     | FABP2      | 10.89 |
| Fatty acid-binding protein, adipocyte                      | FABP4      | 11.38 |
| Fatty acid-binding protein 9                               | FABP9      | 13.99 |
| FAS-associated death domain protein                        | FADD       | 7.21  |
| Protein FAM19A5                                            | FAM19A5    | 21.52 |
| Protein FAM3B                                              | FAM3B      | 12.53 |
| Protein FAM3C                                              | FAM3C      | 11.36 |
| Prolyl endopeptidase FAP                                   | FAP        | 36.57 |
| Tumor necrosis factor receptor superfamily member 6        | FAS        | 10.47 |
| Fas antigen ligand                                         | FasL       | 4.40  |
| Nuclear factor of activated T-cells, cytoplasmic 1         | NFATC1     | 19.12 |
| Fructose-1,6-bisphosphatase 1                              | FBP1       | 28.77 |
| Immunoglobulin alpha Fc receptor                           | FCAR       | 8.28  |
| Low affinity immunoglobulin epsilon Fc receptor            | FCER2      | 17.61 |
| Low affinity immunoglobulin gamma Fc region receptor II-a  | FCGR2A     | 36.86 |
| Low affinity immunoglobulin gamma Fc region receptor III-B | FCGR3B     | 39.98 |
| Ficolin-2                                                  | FCN2       | 40.94 |
| Fc receptor-like protein 1                                 | FCRL1      | 5.41  |
| Fc receptor-like protein 2                                 | FcRL2      | 7.63  |
| Fc receptor-like protein 3                                 | FCRL3      | 1.39  |
| Fc receptor-like protein 5                                 | FCRL5      | 8.49  |
| Fc receptor-like protein 6                                 | FCRL6      | 4.58  |
| Fc receptor-like B                                         | FCRLB      | 21.62 |
| Tyrosine-protein kinase Fes/Fps                            | FES        | 27.86 |

|                                                                          |          |       |
|--------------------------------------------------------------------------|----------|-------|
| Fetuin-B                                                                 | FETUB    | 36.90 |
| Fibroblast growth factor 19                                              | FGF-19   | 13.31 |
| Fibroblast growth factor 2                                               | FGF2     | 9.63  |
| Fibroblast growth factor 21                                              | FGF-21   | 18.52 |
| Fibroblast growth factor 23                                              | FGF-23   | 9.23  |
| Fibroblast growth factor 5                                               | FGF-5    | 0.00  |
| Fibroblast growth factor-binding protein 1                               | FGF-BP1  | 5.88  |
| Fibroblast growth factor receptor 2                                      | FGFR2    | 10.51 |
| Tyrosine-protein kinase Fgr                                              | FGR      | 20.24 |
| Bis(5'-adenosyl)-triphosphatase                                          | FHIT     | 14.36 |
| Peptidyl-prolyl cis-trans isomerase FKBP1B                               | FKBP1B   | 27.92 |
| Peptidyl-prolyl cis-trans isomerase FKBP4                                | FKBP4    | 19.04 |
| Peptidyl-prolyl cis-trans isomerase FKBP5                                | FKBP5    | 15.40 |
| Peptidyl-prolyl cis-trans isomerase FKBP7                                | FKBP7    | 7.36  |
| Friend leukemia integration 1 transcription factor                       | FLI1     | 32.47 |
| Leucine-rich repeat transmembrane protein FLRT2                          | FLRT2    | 10.20 |
| Fms-related tyrosine kinase 3 ligand                                     | Flt3L    | 10.31 |
| Folate receptor beta                                                     | FOLR2    | 10.48 |
| Protein fosB                                                             | FOSB     | 28.00 |
| Forkhead box protein O1                                                  | FOXO1    | 12.90 |
| Folate receptor alpha                                                    | FR-alpha | 9.37  |
| Folate receptor gamma                                                    | FR-gamma | 6.47  |
| Follistatin                                                              | FS       | 13.82 |
| Follistatin-related protein 3                                            | FSTL3    | 10.81 |
| Tissue alpha-L-fucosidase                                                | FUCA1    | 12.79 |
| Furin                                                                    | FUR      | 6.09  |
| Galactoside 3(4)-L-fucosyltransferase,Alpha-(1,3)-fucosyltransferase 3/5 | FUT3/5   | 12.83 |
| Alpha-(1,6)-fucosyltransferase                                           | FUT8     | 14.26 |
| FXYP domain-containing ion transport regulator 5                         | FXYP5    | 9.34  |
| Galanin peptides                                                         | GAL      | 10.20 |
| Galectin-1                                                               | Gal-1    | 6.90  |
| Galectin-3                                                               | Gal-3    | 9.31  |
| Galectin-4                                                               | Gal-4    | 9.74  |
| Galectin-8                                                               | gal-8    | 10.17 |
| Galectin-9                                                               | Gal-9    | 7.60  |
| Polypeptide N-acetylgalactosaminyltransferase 10                         | GALNT10  | 24.46 |
| Polypeptide N-acetylgalactosaminyltransferase 2                          | GALNT2   | 12.39 |
| Polypeptide N-acetylgalactosaminyltransferase 3                          | GALNT3   | 8.47  |
| Growth arrest-specific protein 6                                         | GAS6     | 43.04 |
| Guanylate-binding protein 2                                              | GBP2     | 0.04  |
| Glucagon                                                                 | GCG      | 34.48 |

|                                                                                      |                |       |
|--------------------------------------------------------------------------------------|----------------|-------|
| Beta-1,3-galactosyl-O-glycosyl-glycoprotein beta-1,6-N-acetylglucosaminyltransferase | GCNT1          | 30.95 |
| Glypican-5                                                                           | GCP5           | 6.85  |
| Granulocyte Colony-Stimulating Factor                                                | G-CSF          | 8.59  |
| Growth/differentiation factor 15                                                     | GDF-15         | 11.99 |
| Growth/differentiation factor 2                                                      | GDF-2          | 4.74  |
| Growth/differentiation factor 8                                                      | GDF-8          | 9.10  |
| Glial cell line-derived neurotrophic factor                                          | GDNF           | 0.00  |
| GDNF family receptor alpha-3                                                         | GDNFR-alpha-3  | 8.39  |
| GDNF family receptor alpha-2                                                         | GFRA2          | 8.05  |
| GDNF family receptor alpha-1                                                         | GFR-alpha-1    | 11.48 |
| Glutathione hydrolase 5 proenzyme                                                    | GGT5           | 14.08 |
| Growth hormone                                                                       | GH             | 35.07 |
| Growth hormone variant                                                               | GH2            | 52.49 |
| Appetite-regulating hormone                                                          | GHRL           | 10.80 |
| Gastric intrinsic factor                                                             | GIF            | 9.40  |
| Gastrokine                                                                           | GKN1           | 6.14  |
| Beta-galactosidase                                                                   | GLB1           | 12.55 |
| Lactoylglutathione lyase                                                             | GLO1           | 15.41 |
| Glutaredoxin-1                                                                       | GLRX           | 55.20 |
| Granulocyte-macrophage colony-stimulating factor receptor subunit alpha              | GM-CSF-R-alpha | 10.66 |
| Granulysin                                                                           | GNLY           | 16.29 |
| Platelet glycoprotein Ib alpha chain                                                 | GP1BA          | 42.58 |
| Human GPVI Antibody                                                                  | GPVI           | 17.44 |
| Glypican-1                                                                           | GPC1           | 12.76 |
| Transmembrane glycoprotein NMB                                                       | GPNMB          | 11.89 |
| GRB2-related adapter protein 2                                                       | GRAP2          | 42.93 |
| Granulins                                                                            | GRN            | 8.90  |
| Gamma-secretase-activating protein                                                   | GSAP           | 14.12 |
| Glutathione S-transferase P                                                          | GSTP1          | 0.00  |
| Gastrotropin                                                                         | GT             | 15.24 |
| Beta-glucuronidase                                                                   | GUSB           | 11.73 |
| Granzyme A                                                                           | GZMA           | 10.37 |
| Granzyme B                                                                           | GZMB           | 13.63 |
| Granzyme H                                                                           | GZMH           | 13.37 |
| Hydroxyacylglutathione hydrolase, mitochondrial                                      | HAGH           | 14.36 |
| Hydroxyacid oxidase 1                                                                | HAOX1          | 18.04 |
| Hepatitis A virus cellular receptor 2                                                | HAVCR2         | 8.76  |
| Proheparin-binding EGF-like growth factor                                            | HB-EGF         | 4.17  |
| Hematopoietic lineage cell-specific protein                                          | HCLS1          | 10.57 |

|                                                           |                      |       |
|-----------------------------------------------------------|----------------------|-------|
| Hepatoma-derived growth factor                            | HDGF                 | 10.83 |
| Protein HEXIM1                                            | HEXIM1               | 8.60  |
| Hepatocyte growth factor                                  | HGF                  | 12.61 |
| Kallikrein-11                                             | hK11                 | 9.67  |
| Kallikrein-14                                             | hK14                 | 8.53  |
| Kallikrein-8                                              | hK8                  | 5.38  |
| Heme oxygenase 2                                          | HMOX2                | 45.76 |
| Histamine N-methyltransferase                             | HNMT                 | 4.15  |
| Heme oxygenase 1                                          | HO-1                 | 9.05  |
| Osteoclast-associated immunoglobulin-like receptor        | hOSCAR               | 3.38  |
| Hematopoietic prostaglandin D synthase                    | HPGDS                | 10.06 |
| Heparan sulfate glucosamine 3-O-sulfotransferase 3B1      | HS3ST3B1             | 14.35 |
| Heparan-sulfate 6-O-sulfotransferase 1                    | HS6ST1               | 22.67 |
| Corticosteroid 11-beta-dehydrogenase isozyme 1            | HSD11B1              | 7.47  |
| Heat shock 27 kDa protein                                 | HSP 27               | 6.96  |
| Endoplasmin                                               | HSP90B1              | 0.00  |
| Serine protease HTRA2, mitochondrial                      | HTRA2                | 8.68  |
| Islet cell autoantigen 1                                  | ICA1                 | 12.05 |
| Intercellular adhesion molecule 1                         | ICAM1                | 38.36 |
| Intercellular adhesion molecule 2                         | ICAM-2               | 10.21 |
| Intercellular adhesion molecule 3                         | ICAM3                | 28.83 |
| ICOS ligand                                               | ICOSLG               | 7.38  |
| Alpha-L-iduronidase                                       | IDUA                 | 7.00  |
| Gamma-interferon-inducible lysosomal thiol reductase      | IFI30                | 9.07  |
| Interferon gamma                                          | IFN-gamma            | 0.00  |
| Interferon gamma receptor 1                               | IFN-gamma-R1         | 7.78  |
| Interferon lambda-1                                       | IFNL1                | 10.72 |
| Interferon lambda receptor 1                              | IFNLR1               | 4.72  |
| Insulin-like growth factor 1 receptor                     | IGF1R                | 11.56 |
| Cation-independent mannose-6-phosphate receptor           | IGF2R                | 7.10  |
| Insulin-like growth factor-binding protein 1              | IGFBP-1              | 16.93 |
| Insulin-like growth factor-binding protein 2              | IGFBP-2              | 9.19  |
| Insulin-like growth factor-binding protein 3              | IGFBP3               | 36.56 |
| Insulin-like growth factor-binding protein 6              | IGFBP6               | 37.66 |
| Insulin-like growth factor-binding protein 7              | IGFBP-7              | 12.26 |
| Insulin-like growth factor-binding protein-like 1         | IGFBPL1              | 4.36  |
| Low affinity immunoglobulin gamma Fc region receptor II-b | IgG Fc receptor II-b | 8.63  |
| Ig lambda-2 chain C regions                               | IGLC2                | 34.05 |
| Immunoglobulin superfamily member 3                       | IGSF3                | 14.96 |
| Zinc finger protein Helios                                | IKZF2                | 20.51 |

|                                           |             |       |
|-------------------------------------------|-------------|-------|
| Interleukin-10                            | IL10        | 11.47 |
| Interleukin-10 receptor subunit alpha     | IL-10RA     | 5.08  |
| Interleukin-10 receptor subunit beta      | IL-10RB     | 9.98  |
| Interleukin-12                            | IL-12       | 8.38  |
| Interleukin-12 subunit beta               | IL-12B      | 12.00 |
| Interleukin-12 receptor subunit beta-1    | IL12RB1     | 5.02  |
| Interleukin-13                            | IL-13       | 0.00  |
| Interleukin-13 receptor subunit alpha-1   | IL13RA1     | 11.10 |
| Interleukin-15                            | IL15        | 7.98  |
| Interleukin-15 receptor subunit alpha     | IL-15RA     | 0.00  |
| Pro-interleukin-16                        | IL16        | 8.98  |
| Interleukin-17A                           | IL-17A      | 6.35  |
| Interleukin-17C                           | IL-17C      | 0.00  |
| Interleukin-17D                           | IL-17D      | 7.44  |
| Interleukin-17 receptor A                 | IL-17RA     | 22.15 |
| Interleukin-17 receptor B                 | IL17RB      | 19.05 |
| Interleukin-18                            | IL-18       | 4.17  |
| Interleukin-18-binding protein            | IL-18BP     | 9.27  |
| Interleukin-18 receptor 1                 | IL-18R1     | 11.26 |
| Interleukin-1 alpha                       | IL-1 alpha  | 0.00  |
| Interleukin-1 receptor antagonist protein | IL-1ra      | 6.55  |
| Interleukin-1 receptor-like 2             | IL1RL2      | 4.53  |
| Interleukin-1 receptor type 1             | IL-1RT1     | 9.09  |
| Interleukin-1 receptor type 2             | IL-1RT2     | 9.17  |
| Interleukin-2                             | IL-2        | 0.00  |
| Interleukin-20                            | IL-20       | 0.00  |
| Interleukin-20 receptor subunit alpha     | IL-20RA     | 0.00  |
| Interleukin-22 receptor subunit alpha-1   | IL-22 RA1   | 0.00  |
| Interleukin-24                            | IL-24       | 0.00  |
| Interleukin-27                            | IL-27       | 4.77  |
| Interleukin-2 receptor subunit alpha      | IL2-RA      | 8.99  |
| Interleukin-2 receptor subunit beta       | IL-2RB      | 0.00  |
| Interleukin-32                            | IL32        | 9.20  |
| Interleukin-33                            | IL-33       | 0.00  |
| Interleukin-3 receptor subunit alpha      | IL3RA       | 6.73  |
| Interleukin-4                             | IL-4        | 0.00  |
| Interleukin-4 receptor subunit alpha      | IL-4RA      | 10.64 |
| Interleukin-5                             | IL5         | 10.02 |
| Interleukin-5 receptor subunit alpha      | IL-5R-alpha | 14.06 |
| Interleukin-6                             | IL6         | 5.64  |
| Interleukin-6 receptor subunit alpha      | IL-6RA      | 7.13  |

|                                                                     |          |        |
|---------------------------------------------------------------------|----------|--------|
| Interleukin-7                                                       | IL-7     | 7.62   |
| Interleukin-7 receptor subunit alpha                                | IL7R     | 43.38  |
| Interleukin-8                                                       | IL-8     | 14.52  |
| Integrin-linked kinase-associated serine/threonine phosphatase 2C   | ILKAP    | 21.08  |
| Inositol monophosphatase 1                                          | IMPA1    | 9.46   |
| Inhibitor of growth protein 1                                       | ING1     | 17.09  |
| Inhibin beta C chain                                                | INHBC    | 13.70  |
| Phosphatidylinositol 3,4,5-trisphosphate 5-phosphatase 2            | INPPL1   | 17.11  |
| Ras GTPase-activating-like protein IQGAP2                           | IQGAP2   | 17.81  |
| Interleukin-1 receptor-associated kinase 1                          | IRAK1    | 15.91  |
| Interleukin-1 receptor-associated kinase 4                          | IRAK4    | 5.85   |
| Interferon regulatory factor 9                                      | IRF9     | 7.96   |
| Immunoglobulin superfamily containing leucine-rich repeat protein 2 | ISLR2    | 16.35  |
| Integrin alpha-11                                                   | ITGA11   | 10.77  |
| Integrin alpha-5                                                    | ITGA5    | 14.82  |
| Integrin alpha-6                                                    | ITGA6    | 12.76  |
| Integrin alpha-M                                                    | ITGAM    | 4.92   |
| Integrin alpha-V                                                    | ITGAV    | 9.92   |
| Integrin beta-1                                                     | ITGB1    | 7.87   |
| Integrin beta-1-binding protein 1                                   | ITGB1BP1 | 37.06  |
| Melusin                                                             | ITGB1BP2 | 12.13  |
| Integrin beta-2                                                     | ITGB2    | 93.75  |
| Integrin beta-5                                                     | ITGB5    | 4.31   |
| Integrin beta-6                                                     | ITGB6    | 12.17  |
| Integrin beta-7                                                     | ITGB7    | 1.61   |
| Integral membrane protein 2A                                        | ITM2A    | 41.01  |
| Junctional adhesion molecule A                                      | JAM-A    | 107.66 |
| Junctional adhesion molecule B                                      | JAM-B    | 9.66   |
| Transcription factor AP-1                                           | JUN      | 0.00   |
| Kazal-type serine protease inhibitor domain-containing protein 1    | KAZALD1  | 15.52  |
| KIF1-binding protein                                                | KIF1BP   | 16.27  |
| Kidney Injury Molecule                                              | KIM1     | 3.07   |
| Killer cell immunoglobulin-like receptor 2DL3                       | KIR2DL3  | 15.14  |
| Kin of IRRE-like protein 2                                          | KIRREL2  | 6.10   |
| Mast/stem cell growth factor receptor Kit                           | KIT      | 28.91  |
| Beta-klotho                                                         | KLB      | 11.55  |
| Kallikrein-10                                                       | KLK10    | 32.21  |
| Kallikrein-12                                                       | KLK12    | 25.84  |
| Kallikrein-13                                                       | KLK13    | 13.56  |
| Kallikrein-6                                                        | KLK6     | 8.80   |
| Natural killer cells antigen CD94                                   | KLRD1    | 11.82  |



|                                                                |                |       |
|----------------------------------------------------------------|----------------|-------|
| Importin subunit alpha-5                                       | KPNA1          | 0.00  |
| Keratin, type I cytoskeletal 19                                | KRT19          | 19.81 |
| Kynurenine--oxoglutarate transaminase 1                        | KYAT1          | 10.35 |
| Kynureninase                                                   | KYNU           | 7.65  |
| Lymphocyte activation gene 3 protein                           | LAG3           | 8.48  |
| Leukocyte-associated immunoglobulin-like receptor 1            | LAIR1          | 9.65  |
| Leukocyte-associated immunoglobulin-like receptor 2            | LAIR-2         | 15.12 |
| Laminin subunit alpha-4                                        | LAMA4          | 3.23  |
| Lysosome-associated membrane glycoprotein 3                    | LAMP3          | 9.16  |
| Latency-associated peptide transforming growth factor beta-1   | LAP TGF-beta-1 | 11.78 |
| Linker for activation of T-cells family member 1               | LAT            | 8.95  |
| Linker for activation of T-cells family member 2               | LAT2           | 16.48 |
| Layilin                                                        | LAYN           | 13.25 |
| Neutrophil gelatinase-associated lipocalin                     | LCN2           | 18.04 |
| Low-density lipoprotein receptor                               | LDL receptor   | 14.95 |
| Leptin                                                         | LEP            | 2.93  |
| Leptin receptor                                                | LEPR           | 13.65 |
| Galectin-7                                                     | LGALS7         | 7.26  |
| Legumain                                                       | LGMN           | 9.87  |
| Lutropin subunit beta                                          | LHB            | 9.60  |
| Leukemia inhibitory factor                                     | LIF            | 0.00  |
| Leukemia inhibitory factor receptor                            | LIF-R          | 4.44  |
| Leukocyte immunoglobulin-like receptor subfamily A member 5    | LILRA5         | 6.52  |
| Leukocyte immunoglobulin-like receptor subfamily B member 1    | LILRB1         | 36.26 |
| Leukocyte immunoglobulin-like receptor subfamily B member 2    | LILRB2         | 31.54 |
| Leukocyte immunoglobulin-like receptor subfamily B member 4    | LILRB4         | 4.04  |
| Leukocyte immunoglobulin-like receptor subfamily B member 5    | LILRB5         | 33.34 |
| Lectin-like oxidized LDL receptor 1                            | LOX-1          | 21.63 |
| Lipoprotein lipase                                             | LPL            | 3.54  |
| Leucine-rich repeats and immunoglobulin-like domains protein 1 | LRIG1          | 4.82  |
| Lymphoid-restricted membrane protein                           | LRMP           | 9.60  |
| Prolow-density lipoprotein receptor-related protein 1          | LRP1           | 17.86 |
| Low-density lipoprotein receptor-related protein 11            | LRP11          | 7.21  |
| Leucine-rich repeat neuronal protein 1                         | LRRN1          | 19.54 |
| Leukotriene A-4 hydrolase                                      | LTA4H          | 29.79 |
| Latent-transforming growth factor beta-binding protein 2       | LTBP2          | 0.94  |
| Lymphotoxin-beta receptor                                      | LTBR           | 11.76 |
| Latexin                                                        | LXN            | 2.89  |
| Lymphocyte antigen 75                                          | LY75           | 4.59  |
| T-lymphocyte surface antigen Ly-9                              | LY9            | 7.68  |

|                                                                     |             |       |
|---------------------------------------------------------------------|-------------|-------|
| Cell growth-regulating nucleolar protein                            | LYAR        | 15.52 |
| Tyrosine-protein kinase Lyn                                         | LYN         | 10.23 |
| Ly6/PLAUR domain-containing protein 1                               | LYPD1       | 1.34  |
| Ly6/PLAUR domain-containing protein 3                               | LYPD3       | 9.72  |
| Lymphatic vessel endothelial hyaluronic acid receptor 1             | LYVE1       | 29.95 |
| Mitotic spindle assembly checkpoint protein MAD1                    | MAD1L1      | 21.51 |
|                                                                     | MAD homolog |       |
| Mothers against decapentaplegic homolog 5                           | 5           | 3.82  |
| Macrophage erythroblast attacher                                    | MAEA        | 51.99 |
| Melanoma-associated antigen D1                                      | MAGED1      | 33.61 |
| Mesencephalic astrocyte-derived neurotrophic factor                 | MANF        | 3.55  |
| Dual specificity mitogen-activated protein kinase kinase 6          | MAP2K6      | 14.03 |
| Mitogen-activated protein kinase kinase kinase kinase 5             | MAP4K5      | 15.86 |
| Microtubule-associated protein Tau                                  | MAPT        | 0.00  |
| Macrophage receptor MARCO                                           | MARCO       | 4.11  |
| Mannan-binding lectin serine protease 1                             | MASP1       | 8.54  |
| Matrilin-2                                                          | MATN2       | 10.63 |
| Matrilin-3                                                          | MATN3       | 7.25  |
| Protein max                                                         | MAX         | 36.05 |
| Myoglobin                                                           | MB          | 7.87  |
| Mannose-binding protein C                                           | MBL2        | 65.70 |
| Multiple coagulation factor deficiency protein 2                    | MCFD2       | 10.58 |
| Monocyte chemotactic protein 1                                      | MCP-1       | 11.38 |
| Monocyte chemotactic protein 2                                      | MCP-2       | 10.74 |
| Monocyte chemotactic protein 3                                      | MCP-3       | 9.75  |
| Monocyte chemotactic protein 4                                      | MCP-4       | 13.79 |
| MAM domain-containing glycosylphosphatidylinositol anchor protein 1 | MDGA1       | 12.34 |
| Multiple epidermal growth factor-like domains protein 9             | MEGF9       | 27.38 |
| Meprin A subunit beta                                               | MEP1B       | 10.96 |
| Matrix extracellular phosphoglycoprotein                            | MEPE        | 7.54  |
| Tyrosine-protein kinase Mer                                         | MERTK       | 1.96  |
| LDLR chaperone MESD                                                 | MESDC2      | 11.90 |
| Hepatocyte growth factor receptor                                   | MET         | 29.75 |
| Methionine aminopeptidase 1                                         | METAP1      | 4.98  |
| Methionine aminopeptidase 1D, mitochondrial                         | METAP1D     | 25.72 |
| Methionine aminopeptidase 2                                         | MetAP 2     | 10.38 |
| Meteorin-like protein                                               | METRNL      | 4.00  |
| Microfibrillar-associated protein 5                                 | MFAP5       | 27.58 |
| Lactadherin                                                         | MFGE8       | 13.67 |
| Methylated-DNA--protein-cysteine methyltransferase                  | MGMT        | 9.14  |
| Melanoma-derived growth regulatory protein                          | MIA         | 7.45  |

|                                                    |         |       |
|----------------------------------------------------|---------|-------|
| MHC class I polypeptide-related sequence A/B       | MIC-A/B | 7.41  |
| Macrophage migration inhibitory factor             | MIF     | 20.78 |
| Allergin-1                                         | MILR1   | 5.35  |
| Midkine                                            | MK      | 11.44 |
| Matrix metalloproteinase-1                         | MMP-1   | 12.13 |
| Matrix metalloproteinase-10                        | MMP-10  | 7.35  |
| Matrix metalloproteinase-12                        | MMP-12  | 2.67  |
| Matrix metalloproteinase-2                         | MMP-2   | 8.93  |
| Matrix metalloproteinase-3                         | MMP-3   | 12.66 |
| Matrix metalloproteinase-7                         | MMP-7   | 8.05  |
| Matrix metalloproteinase-9                         | MMP-9   | 23.37 |
| Myelin-oligodendrocyte glycoprotein                | MOG     | 15.89 |
| Myeloperoxidase                                    | MPO     | 72.59 |
| C-type mannose receptor 2                          | MRC2    | 14.00 |
| Mesothelin                                         | MSLN    | 10.19 |
| Beta-microseminoprotein                            | MSMB    | 8.37  |
| Macrophage scavenger receptor types I and II       | MSR1    | 7.73  |
| Mucin-16                                           | MUC-16  | 7.83  |
| Mevalonate kinase                                  | MVK     | 16.81 |
| Myocilin                                           | MYOC    | 7.94  |
| NKG2D ligand 2                                     | N2DL-2  | 3.32  |
| N-alpha-acetyltransferase 10                       | NAA10   | 23.10 |
| N-acyl ethanolamine-hydrolyzing acid amidase       | NAAA    | 10.76 |
| NAD kinase                                         | NADK    | 5.24  |
| Neuroblastoma suppressor of tumorigenicity 1       | NBL1    | 5.75  |
| Nibrin                                             | NBN     | 22.32 |
| Neural cell adhesion molecule 1                    | NCAM1   | 31.83 |
| Neurocan core protein                              | NCAN    | 7.66  |
| Neutral ceramidase                                 | N-CDase | 6.89  |
| Neutrophil cytosol factor 2                        | NCF2    | 28.76 |
| Nicalin                                            | NCLN    | 0.00  |
| Natural cytotoxicity triggering receptor 1         | NCR1    | 6.21  |
| Protein NDRG1                                      | NDRG1   | 6.01  |
| Nectin-2                                           | NECTIN2 | 13.90 |
| Neurofilament light polypeptide                    | NEFL    | 17.98 |
| NF-kappa-B essential modulator                     | NEMO    | 44.21 |
| Neprilysin                                         | NEP     | 7.37  |
| Merlin                                             | NF2     | 9.83  |
| Nuclear factor of activated T-cells, cytoplasmic 3 | NFATC3  | 4.14  |
| NF-kappa-B inhibitor epsilon                       | NFKBIE  | 13.48 |
| Nidogen-1                                          | NID1    | 39.00 |

|                                                                          |           |       |
|--------------------------------------------------------------------------|-----------|-------|
| Nidogen-2                                                                | NID2      | 6.46  |
| Ninjurin-1                                                               | NINJ1     | 3.17  |
| Nicotinamide/nicotinic acid mononucleotide adenylyltransferase 1         | NMNAT1    | 10.44 |
| Nodal modulator 1                                                        | NOMO1     | 12.44 |
| Nitric oxide synthase, endothelial                                       | NOS3      | 12.01 |
| Neurogenic locus notch homolog protein 1                                 | NOTCH1    | 36.58 |
| Neurogenic locus notch homolog protein 3                                 | Notch 3   | 7.97  |
| Protein NOV homolog                                                      | NOV       | 6.92  |
| Neural proliferation differentiation and control protein 1               | NPDC1     | 11.94 |
| Nucleophosmin                                                            | NPM1      | 13.36 |
| C-type natriuretic peptide                                               | NPPC      | 16.62 |
| Neuronal pentraxin receptor                                              | NPTXR     | 5.58  |
| Ribosyldihydronicotinamide dehydrogenase (quinone)                       | NQO2      | 15.07 |
| Neuronal cell adhesion molecule                                          | Nr-CAM    | 4.47  |
| Neuropilin-1                                                             | NRP1      | 25.78 |
| Neuropilin-2                                                             | NRP2      | 14.92 |
| Neurturin                                                                | NRTN      | 4.78  |
| Neurotrophin-3                                                           | NT-3      | 17.92 |
| Neurotrophin-4                                                           | NTF4      | 11.54 |
| N-terminal prohormone brain natriuretic peptide                          | NT-proBNP | 14.23 |
| BDNF/NT-3 growth factors receptor                                        | NTRK2     | 5.98  |
| NT-3 growth factor receptor                                              | NTRK3     | 5.95  |
| NEDD8 ultimate buster 1                                                  | NUB1      | 11.67 |
| Nucleobindin-2                                                           | NUCB2     | 22.88 |
| ADP-sugar pyrophosphatase                                                | NUDT5     | 10.08 |
| Neurexophilin-1                                                          | NXPH1     | 0.00  |
| Osteomodulin                                                             | OMD       | 18.02 |
| Oligodendrocyte-myelin glycoprotein                                      | OMG       | 19.26 |
| Osteoprotegerin                                                          | OPG       | 8.59  |
| Osteopontin                                                              | OPN       | 14.43 |
| Opticin                                                                  | OPTC      | 15.05 |
| Oncostatin-M                                                             | OSM       | 12.37 |
| Oncostatin-M-specific receptor subunit beta                              | OSMR      | 23.94 |
| Protein disulfide-isomerase                                              | P4HB      | 10.83 |
| Protein-arginine deiminase type-2                                        | PADI2     | 1.66  |
| Glycodelin                                                               | PAEP      | 12.76 |
| Phosphoprotein associated with glycosphingolipid-enriched microdomains 1 | PAG1      | 59.29 |
| Plasminogen activator inhibitor 1                                        | PAI       | 7.37  |
| Serine/threonine-protein kinase PAK 4                                    | PAK4      | 12.37 |
| Peptidyl-glycine alpha-amidating monooxygenase                           | PAM       | 34.38 |
| Inactive serine protease PAMR1                                           | PAMR1     | 14.64 |

|                                                                            |                |       |
|----------------------------------------------------------------------------|----------------|-------|
| Pappalysin-1                                                               | PAPPA          | 8.09  |
| Proteinase-activated receptor 1                                            | PAR-1          | 3.36  |
| Protein deglycase DJ-1                                                     | PARK7          | 11.00 |
| Poly (ADP-ribose) polymerase 1                                             | PARP-1         | 19.34 |
| Protocadherin-17                                                           | PCDH17         | 19.09 |
| Procollagen C-endopeptidase enhancer 1                                     | PCOLCE         | 38.31 |
| Proprotein convertase subtilisin/kexin type 9                              | PCSK9          | 9.28  |
| Programmed cell death protein 1                                            | PDCD1          | 28.13 |
| Platelet-derived growth factor C                                           | PDGFC          | 19.55 |
| Platelet-derived growth factor receptor alpha                              | PDGF-R-alpha   | 8.47  |
| Platelet-derived growth factor receptor beta                               | PDGFRB         | 5.63  |
| Platelet-derived growth factor subunit A                                   | PDGF subunit A | 13.45 |
| Platelet-derived growth factor subunit B                                   | PDGF subunit B | 14.61 |
| Programmed cell death 1 ligand 1                                           | PD-L1          | 6.44  |
| Programmed cell death 1 ligand 2                                           | PD-L2          | 3.48  |
| (Pyruvate dehydrogenase (acetyl-transferring))-phosphatase 1, mitochondria | PDP1           | 0.00  |
| Platelet endothelial aggregation receptor 1                                | PEAR1          | 13.20 |
| Phosphatidylethanolamine-binding protein 1                                 | PEBP1          | 12.56 |
| Platelet endothelial cell adhesion molecule                                | PECAM-1        | 85.23 |
| Prefoldin subunit 2                                                        | PFDN2          | 9.69  |
| ATP-dependent 6-phosphofructokinase, muscle type                           | PFKM           | 7.31  |
| Placenta growth factor                                                     | PGF            | 5.13  |
| Peptidoglycan recognition protein 1                                        | PGLYRP1        | 7.77  |
| Phosphoethanolamine/phosphocholine phosphatase                             | PHOSPHO1       | 14.44 |
| Elafin                                                                     | PI3            | 8.57  |
| Polymeric immunoglobulin receptor                                          | PIgR           | 4.64  |
| Phosphoinositide 3-kinase adapter protein 1                                | PIK3AP1        | 6.41  |
| Paired immunoglobulin-like type 2 receptor alpha                           | PILRA          | 14.40 |
| Paired immunoglobulin-like type 2 receptor beta                            | PILRB          | 8.11  |
| Group 10 secretory phospholipase A2                                        | PLA2G10        | 12.72 |
| Cytosolic phospholipase A2                                                 | PLA2G4A        | 10.35 |
| Platelet-activating factor acetylhydrolase                                 | PLA2G7         | 18.94 |
| Perlecan                                                                   | PLC            | 7.92  |
| Perilipin-1                                                                | PLIN1          | 14.83 |
| Phospholipid transfer protein                                              | PLTP           | 28.67 |
| Plexin domain-containing protein 1                                         | PLXDC1         | 8.04  |
| Plexin-A4                                                                  | PLXNA4         | 19.35 |
| Plexin-B1                                                                  | PLXNB1         | 9.18  |
| Plexin-B2                                                                  | PLXNB2         | 22.50 |

|                                                                               |         |       |
|-------------------------------------------------------------------------------|---------|-------|
| Plexin-B3                                                                     | PLXNB3  | 11.39 |
| Phosphomevalonate kinase                                                      | PMVK    | 23.92 |
| Podocalyxin                                                                   | PODXL   | 12.90 |
| Podocalyxin-like protein 2                                                    | PODXL2  | 17.32 |
| Serum paraoxonase/arylesterase 2                                              | PON2    | 17.59 |
| Paraoxonase                                                                   | PON3    | 11.77 |
| Peptidyl-prolyl cis-trans isomerase B                                         | PPIB    | 11.82 |
| Protein phosphatase 1B                                                        | PPM1B   | 0.00  |
| Protein phosphatase inhibitor 2                                               | PPP1R2  | 20.10 |
| Neurabin-2                                                                    | PPP1R9B | 13.46 |
| Calcineurin subunit B type 1                                                  | PPP3R1  | 14.31 |
| Pancreatic prohormone                                                         | PPY     | 8.86  |
| Lysosomal Pro-X carboxypeptidase                                              | PRCP    | 8.88  |
| Peroxiredoxin-1                                                               | PRDX1   | 6.29  |
| Thioredoxin-dependent peroxide reductase, mitochondrial                       | PRDX3   | 14.55 |
| Peroxiredoxin-5, mitochondrial                                                | PRDX5   | 24.19 |
| Peroxiredoxin-6                                                               | PRDX6   | 21.98 |
| Prolactin regulatory element-binding protein                                  | PREB    | 6.17  |
| Prolargin                                                                     | PRELP   | 3.01  |
| 5'-AMP-activated protein kinase subunit beta-1                                | PRKAB1  | 19.42 |
| Protein kinase C theta type                                                   | PRKCQ   | 16.71 |
| Interferon-inducible double-stranded RNA-dependent protein kinase activator A | PRKRA   | 24.14 |
| Vitamin K-dependent protein C                                                 | PROC    | 44.87 |
| Prokineticin-1                                                                | PROK1   | 14.70 |
| Trypsin-2                                                                     | PRSS2   | 32.75 |
| Serine protease 27                                                            | PRSS27  | 6.76  |
| Prostasin                                                                     | PRSS8   | 1.43  |
| Phosphoribosyltransferase domain-containing protein 1                         | PRTFDC1 | 17.94 |
| Protogenin                                                                    | PRTG    | 11.79 |
| Myeloblastin                                                                  | PRTN3   | 57.28 |
| Pregnancy-specific beta-1-glycoprotein 1                                      | PSG1    | 14.46 |
| P-selectin glycoprotein ligand 1                                              | PSGL-1  | 8.43  |
| PC4 and SFRS1-interacting protein                                             | PSIP1   | 9.04  |
| Proteasome subunit alpha type-1                                               | PSMA1   | 14.80 |
| Proteasome activator complex subunit 1                                        | PSME1   | 12.68 |
| Pulmonary surfactant-associated protein D                                     | PSP-D   | 11.97 |
| Parathyroid hormone/parathyroid hormone-related peptide receptor              | PTH1R   | 11.62 |
| Inactive tyrosine-protein kinase 7                                            | PTK7    | 32.88 |
| Pleiotrophin                                                                  | PTN     | 32.07 |
| Tyrosine-protein phosphatase non-receptor type 1                              | PTPN1   | 16.74 |

|                                                              |         |       |
|--------------------------------------------------------------|---------|-------|
| Tyrosine-protein phosphatase non-receptor type 6             | PTPN6   | 12.88 |
| Receptor-type tyrosine-protein phosphatase F                 | PTPRF   | 10.16 |
| Receptor-type tyrosine-protein phosphatase eta               | PTPRJ   | 18.54 |
| Receptor-type tyrosine-protein phosphatase S                 | PTPRS   | 25.30 |
| 6-pyruvoyl tetrahydrobiopterin synthase                      | PTS     | 16.75 |
| Pentraxin-related protein PTX3                               | PTX3    | 15.75 |
| Parvalbumin alpha                                            | PVALB   | 14.30 |
| Poliovirus receptor                                          | PVR     | 9.44  |
| Nectin-4                                                     | PVRL4   | 7.54  |
| Paxillin                                                     | PXN     | 18.64 |
| Dihydropteridine reductase                                   | QDPR    | 10.90 |
| Glutamyl-peptide cyclotransferase                            | QPCT    | 20.65 |
| Receptor for advanced glycosylation end products             | RAGE    | 4.47  |
| Retinoic acid receptor responder protein 1                   | RARRES1 | 5.82  |
| Retinoic acid receptor responder protein 2                   | RARRES2 | 7.28  |
| Ras GTPase-activating protein 1                              | RASA1   | 21.47 |
| Ras association domain-containing protein 2                  | RASSF2  | 25.61 |
| Ribokinase                                                   | RBKS    | 16.75 |
| REST corepressor 1                                           | RCOR1   | 37.53 |
| Lithostathine-1-alpha                                        | REG1A   | 31.47 |
| Regenerating islet-derived protein 3-alpha                   | REG3A   | 0.00  |
| Regenerating islet-derived protein 4                         | REG4    | 14.18 |
| Tumor necrosis factor receptor superfamily member 19L        | RELT    | 8.71  |
| Renin                                                        | REN     | 9.62  |
| Proto-oncogene tyrosine-protein kinase receptor Ret          | RET     | 13.90 |
| Resistin                                                     | RETN    | 12.18 |
| Repulsive guidance molecule A                                | RGMA    | 7.80  |
| RGM domain family member B                                   | RGMB    | 10.77 |
| Regulator of G-protein signaling 8                           | RGS8    | 0.55  |
| Eosinophil cationic protein                                  | RNASE3  | 34.59 |
| E3 ubiquitin-protein ligase RNF31                            | RNF31   | 7.82  |
| Roundabout homolog 1                                         | ROBO1   | 7.93  |
| Roundabout homolog 2                                         | ROBO2   | 12.60 |
| Inactive tyrosine-protein kinase transmembrane receptor ROR1 | ROR1    | 6.40  |
| Ribosomal protein S6 kinase beta-1                           | RPS6KB1 | 20.59 |
| Ribonucleoside-diphosphate reductase subunit M2 B            | RRM2B   | 7.89  |
| R-spondin-1                                                  | RSPO1   | 11.85 |
| R-spondin-3                                                  | RSPO3   | 13.54 |
| Reticulon-4 receptor                                         | RTN4R   | 2.94  |
| Protein S100-A11                                             | S100A11 | 17.47 |
| Protein S100-A4                                              | S100A4  | 10.62 |

|                                                            |           |       |
|------------------------------------------------------------|-----------|-------|
| Protein S100-P                                             | S100P     | 8.62  |
| Serum amyloid A-4 protein                                  | SAA4      | 40.51 |
| Secretory carrier-associated membrane protein 3            | SCAMP3    | 19.76 |
| Scavenger receptor class A member 5                        | SCARA5    | 7.86  |
| Lysosome membrane protein 2                                | SCARB2    | 7.94  |
| Scavenger receptor class F member 1                        | SCARF1    | 10.08 |
| Scavenger receptor class F member 2                        | SCARF2    | 14.88 |
| Stem cell factor                                           | SCF       | 2.78  |
| Secretoglobulin family 1A member 1                         | SCGB1A1   | 3.98  |
| Secretoglobulin family 3A member 1                         | SCGB3A1   | 8.83  |
| Secretoglobulin family 3A member 2                         | SCGB3A2   | 14.54 |
| Syndecan-4                                                 | SDC4      | 11.57 |
| E-selectin                                                 | SELE      | 8.06  |
| L-selectin                                                 | SELL      | 38.90 |
| P-selectin                                                 | SELP      | 51.67 |
| Semaphorin-3F                                              | SEMA3F    | 9.35  |
| Semaphorin-4C                                              | SEMA4C    | 7.23  |
| Semaphorin-7A                                              | SEMA7A    | 9.06  |
| Serpin A12                                                 | SERPINA12 | 6.04  |
| Plasma serine protease inhibitor                           | SERPINA5  | 39.20 |
| Thyroxine-binding globulin                                 | SERPINA7  | 36.48 |
| Serpin A9                                                  | SERPINA9  | 12.03 |
| Serpin B6                                                  | SERPINB6  | 18.40 |
| Serpin B8                                                  | SERPINB8  | 29.57 |
| Seizure 6-like protein                                     | SEZ6L     | 9.69  |
| Seizure 6-like protein 2                                   | SEZ6L2    | 13.12 |
| Secreted frizzled-related protein 1                        | SFRP1     | 18.57 |
| Secreted frizzled-related protein 3                        | sFRP-3    | 14.14 |
| SH2B adapter protein 3                                     | SH2B3     | 11.79 |
| SH2 domain-containing protein 1A                           | SH2D1A    | 7.43  |
| Tyrosine-protein phosphatase non-receptor type substrate 1 | SHPs-1    | 10.27 |
| Sialoadhesin                                               | SIGLEC1   | 7.90  |
| Sialic acid-binding Ig-like lectin 10                      | SIGLEC10  | 5.00  |
| Sialic acid-binding Ig-like lectin 6                       | SIGLEC6   | 15.58 |
| Sialic acid-binding Ig-like lectin 7                       | SIGLEC7   | 8.29  |
| Sialic acid-binding Ig-like lectin 9                       | Siglec-9  | 7.51  |
| Signal-regulatory protein beta-1                           | SIRPB1    | 8.59  |
| SIR2-like protein 2                                        | SIRT2     | 14.60 |
| NAD-dependent protein deacylase sirtuin-5, mitochondrial   | SIRT5     | 22.99 |
| Signaling threshold-regulating transmembrane adapter 1     | SIT1      | 6.42  |
| Src kinase-associated phosphoprotein 1                     | SKAP1     | 17.63 |



|                                                                          |         |       |
|--------------------------------------------------------------------------|---------|-------|
| Serine/threonine-protein kinase receptor R3                              | SKR3    | 7.28  |
| Signaling lymphocytic activation molecule                                | SLAMF1  | 0.00  |
| SLAM family member 7                                                     | SLAMF7  | 3.39  |
| SLAM family member 8                                                     | SLAMF8  | 10.78 |
| SLIT and NTRK-like protein 2                                             | SLITRK2 | 19.45 |
| SLIT and NTRK-like protein 6                                             | SLITRK6 | 0.00  |
| Mothers against decapentaplegic homolog 1                                | SMAD1   | 15.69 |
| SPARC-related modular calcium-binding protein 1                          | SMOC1   | 18.10 |
| SPARC-related modular calcium-binding protein 2                          | SMOC2   | 14.45 |
| Sphingomyelin phosphodiesterase                                          | SMPD1   | 8.11  |
| Synaptosomal-associated protein 23                                       | SNAP23  | 80.75 |
| Synaptosomal-associated protein 29                                       | SNAP29  | 13.53 |
| Gamma-synuclein                                                          | SNCG    | 26.21 |
| Superoxide dismutase (Cu-Zn)                                             | SOD1    | 11.26 |
| Superoxide dismutase (Mn), mitochondrial (SOD2)                          | SOD2    | 24.25 |
| VPS10 domain-containing receptor SorCS2                                  | SORCS2  | 18.11 |
| Sortilin                                                                 | SORT1   | 8.39  |
| Sclerostin                                                               | SOST    | 11.32 |
| SPARC                                                                    | SPARC   | 15.25 |
| SPARC-like protein 1                                                     | SPARCL1 | 26.88 |
| Serine protease inhibitor Kazal-type 1                                   | SPINK1  | 6.35  |
| Serine protease inhibitor Kazal-type 5                                   | SPINK5  | 7.38  |
| Kunitz-type protease inhibitor 1                                         | SPINT1  | 11.87 |
| Kunitz-type protease inhibitor 2                                         | SPINT2  | 2.99  |
| Testican-1                                                               | SPOCK1  | 10.15 |
| Spondin-1                                                                | SPON1   | 17.65 |
| Spondin-2                                                                | SPON2   | 3.19  |
| Protein sprouty homolog 2                                                | SPRY2   | 16.40 |
| Proto-oncogene tyrosine-protein kinase Src                               | SRC     | 9.80  |
| Signal recognition particle 14 kDa protein                               | SRP14   | 16.11 |
| SRSF protein kinase 2                                                    | SRPK2   | 9.83  |
| Scavenger receptor cysteine-rich domain-containing group B protein       | SSC4D   | 6.90  |
| Sulfotransferase 1A1                                                     | ST1A1   | 5.53  |
| ST2 protein                                                              | ST2     | 9.61  |
| CMP-N-acetylneuraminate-beta-galactosamide-alpha-2,3-sialyltransferase 1 | ST3GAL1 | 21.12 |
| Beta-galactoside alpha-2,6-sialyltransferase 1                           | ST6GAL1 | 36.38 |
| STAM-binding protein                                                     | STAMPB  | 7.68  |
| Stanniocalcin-1                                                          | STC1    | 6.57  |
| Stress-induced-phosphoprotein 1                                          | STIP1   | 10.86 |
| Serine/threonine-protein kinase 4                                        | STK4    | 9.73  |
| Syntaxin-16                                                              | STX16   | 15.96 |

|                                                             |           |       |
|-------------------------------------------------------------|-----------|-------|
| Syntaxin-6                                                  | STX6      | 12.35 |
| Syntaxin-8                                                  | STX8      | 10.71 |
| Syntaxin-binding protein 3                                  | STXBP3    | 21.76 |
| Bile salt sulfotransferase                                  | SULT2A1   | 16.51 |
| Sulfatase-modifying factor 2                                | SUMF2     | 8.30  |
| Syndecan-1                                                  | SYND1     | 8.59  |
| Transforming acidic coiled-coil-containing protein 3        | TACC3     | 25.20 |
| Tumor-associated calcium signal transducer 2                | TACSTD2   | 12.84 |
| TRAF family member-associated NF-kappa-B activator          | TANK      | 19.11 |
| Tubulin-folding cofactor B                                  | TBCB      | 21.55 |
| T-cell leukemia / lymphoma protein 1A                       | TCL1A     | 12.08 |
| T-cell leukemia/lymphoma protein 1B                         | TCL1B     | 20.72 |
| Transcobalamin-2                                            | TCN2      | 24.83 |
| Teratocarcinoma-derived growth factor 1                     | TDGF1     | 1.96  |
| Tudor and KH domain-containing protein                      | TDRKH     | 11.59 |
| Tissue factor                                               | TF        | 2.27  |
| Trefoil factor 2                                            | TFF2      | 6.68  |
| Trefoil factor 3                                            | TFF3      | 8.63  |
| Tissue factor pathway inhibitor                             | TFPI      | 7.85  |
| Tissue factor pathway inhibitor 2                           | TFPI-2    | 10.20 |
| Transforming growth factor alpha                            | TGF-alpha | 12.53 |
| Transforming growth factor-beta-induced protein ig-h3       | TGFB1     | 38.07 |
| Transforming growth factor beta receptor type 3             | TGFB3     | 33.44 |
| TGF-beta receptor type-2                                    | TGFR-2    | 6.30  |
| Protein-glutamine gamma-glutamyltransferase 2               | TGM2      | 10.54 |
| Thrombospondin-2                                            | THBS2     | 6.68  |
| Thrombospondin-4                                            | THBS4     | 40.18 |
| Thimet oligopeptidase                                       | THOP1     | 8.11  |
| Thrombopoietin                                              | THPO      | 4.04  |
| Thy-1 membrane glycoprotein                                 | THY 1     | 4.86  |
| Tyrosine-protein kinase receptor Tie-1                      | TIE1      | 30.50 |
| Angiopoietin-1 receptor                                     | TIE2      | 3.24  |
| Fructose-2,6-bisphosphatase TIGAR                           | TIGAR     | 27.35 |
| T-cell immunoglobulin and mucin domain-containing protein 4 | TIMD4     | 26.14 |
| Metalloproteinase inhibitor 1                               | TIMP1     | 34.91 |
| Metalloproteinase inhibitor 4                               | TIMP4     | 10.52 |
| Tubulointerstitial nephritis antigen-like                   | TINAGL1   | 7.49  |
| Toll-like receptor 3                                        | TLR3      | 8.29  |
| Trem-like transcript 2 protein                              | TLT-2     | 16.81 |
| Thrombomodulin TM                                           | TM        | 4.41  |
| Enteropeptidase                                             | TMPRSS15  | 5.18  |

|                                                          |           |       |
|----------------------------------------------------------|-----------|-------|
| Transmembrane protease serine 5                          | TMPRSS5   | 8.83  |
| Thymosin beta-10                                         | TMSB10    | 12.51 |
| Tenascin                                                 | TNC       | 35.55 |
| Tumor necrosis factor                                    | TNF       | 0.00  |
| TNF-beta                                                 | TNFB      | 9.09  |
| Tumor necrosis factor receptor 1                         | TNF-R1    | 5.89  |
| Tumor necrosis factor receptor 2                         | TNF-R2    | 7.69  |
| Tumor necrosis factor receptor superfamily member 10A    | TNFRSF10A | 5.86  |
| Tumor necrosis factor receptor superfamily member 10C    | TNFRSF10C | 12.93 |
| Tumor necrosis factor receptor superfamily member 11A    | TNFRSF11A | 3.26  |
| Tumor necrosis factor receptor superfamily member 12A    | TNFRSF12A | 9.07  |
| Tumor necrosis factor receptor superfamily member 13B    | TNFRSF13B | 5.98  |
| Tumor necrosis factor receptor superfamily member 13C    | TNFRSF13C | 0.00  |
| Tumor necrosis factor receptor superfamily member 14     | TNFRSF14  | 16.32 |
| Tumor necrosis factor receptor superfamily member 19     | TNFRSF19  | 10.28 |
| Tumor necrosis factor receptor superfamily member 21     | TNFRSF21  | 8.81  |
| Tumor necrosis factor receptor superfamily member 4      | TNFRSF4   | 6.95  |
| Tumor necrosis factor receptor superfamily member 6B     | TNFRSF6B  | 9.79  |
| Tumor necrosis factor receptor superfamily member 9      | TNFRSF9   | 7.83  |
| Tumor necrosis factor ligand superfamily member 13       | TNFSF13   | 9.97  |
| Tumor necrosis factor ligand superfamily member 13B      | TNFSF13B  | 6.86  |
| Tumor necrosis factor ligand superfamily member 14       | TNFSF14   | 15.82 |
| Troponin I, cardiac muscle                               | TNNI3     | 29.73 |
| Tenascin-R                                               | TN-R      | 5.93  |
| Tenascin-X                                               | TNXB      | 21.68 |
| DNA topoisomerase 2-beta                                 | TOP2B     | 28.29 |
| Cellular tumor antigen p53                               | TP53      | 6.29  |
| Tissue-type plasminogen activator                        | t-PA      | 10.56 |
| Tripeptidyl-peptidase 1                                  | TPP1      | 11.94 |
| Tubulin polymerization-promoting protein family member 3 | TPPP3     | 8.64  |
| Tryptase alpha/beta-1                                    | TPSAB1    | 9.85  |
| Transferrin receptor protein 1                           | TR        | 14.83 |
| TNF receptor-associated factor 2                         | TRAF2     | 5.35  |
| TNF-related apoptosis-inducing ligand                    | TRAIL     | 12.60 |
| TNF-related apoptosis-inducing ligand receptor 2         | TRAIL-R2  | 3.37  |
| TNF-related activation-induced cytokine                  | TRANCE    | 12.34 |
| Tartrate-resistant acid phosphatase type 5               | TR-AP     | 7.22  |
| Triggering receptor expressed on myeloid cells 1         | TREM1     | 11.35 |
| E3 ubiquitin-protein ligase TRIM21                       | TRIM21    | 19.55 |
| Tripartite motif-containing protein 5                    | TRIM5     | 3.01  |
| Thyrotropin subunit beta                                 | TSHB      | 8.81  |

|                                                                        |         |       |
|------------------------------------------------------------------------|---------|-------|
| Thymic stromal lymphopoietin                                           | TSLP    | 0.00  |
| Tumor necrosis factor (Ligand) superfamily, member 12                  | TWEAK   | 11.67 |
| Alpha-taxilin                                                          | TXLNA   | 6.73  |
| Thioredoxin domain-containing protein 5                                | TXNDC5  | 24.95 |
| Thymidine phosphorylase                                                | TYMP    | 15.62 |
| Tyrosine-protein kinase receptor TYRO3                                 | TYRO3   | 6.55  |
| NEDD8-conjugating enzyme UBE2F                                         | UBE2F   | 3.48  |
| Uromodulin                                                             | UMOD    | 23.93 |
| Netrin receptor UNC5C                                                  | UNC5C   | 15.38 |
| Urokinase-type plasminogen activator                                   | uPA     | 28.12 |
| Urokinase plasminogen activator surface receptor                       | U-PAR   | 28.33 |
| Ubiquitin carboxyl-terminal hydrolase 8                                | USP8    | 19.55 |
| Vesicle-associated membrane protein 5                                  | VAMP5   | 8.88  |
| Vasohibin-1                                                            | VASH1   | 8.26  |
| Vasorin                                                                | VASN    | 28.35 |
| Vascular cell adhesion protein 1                                       | VCAM1   | 38.52 |
| Versican core protein                                                  | VCAN    | 9.59  |
| Vascular endothelial growth factor A                                   | VEGF-A  | 10.57 |
| Vascular endothelial growth factor C                                   | VEGFC   | 22.76 |
| Vascular endothelial growth factor D                                   | VEGFD   | 5.87  |
| Vascular endothelial growth factor receptor 2                          | VEGFR-2 | 6.67  |
| Vascular endothelial growth factor receptor 3                          | VEGFR-3 | 7.26  |
| Vimentin                                                               | VIM     | 7.93  |
| V-set and immunoglobulin domain-containing protein 2                   | VSIG2   | 13.20 |
| V-set and immunoglobulin domain-containing protein 4                   | VSIG4   | 10.12 |
| V-set and transmembrane domain-containing protein 1                    | VSTM1   | 18.21 |
| Brorin                                                                 | VWC2    | 14.96 |
| von Willebrand factor                                                  | vWF     | 15.22 |
| Wiskott-Aldrich syndrome protein                                       | WAS     | 22.89 |
| Wiskott-Aldrich syndrome protein family member 1                       | WASF1   | 10.74 |
| Wiskott-Aldrich syndrome protein family member 3                       | WASF3   | 28.85 |
| WAP four-disulfide core domain protein 2                               | WFDC2   | 6.66  |
| WAP, Kazal, immunoglobulin, Kunitz and NTR domain-containing protein 1 | WFIKKN1 | 6.75  |
| WAP, Kazal, immunoglobulin, Kunitz and NTR domain-containing protein 2 | WFIKKN2 | 12.29 |
| Wnt inhibitory factor 1                                                | WIF-1   | 11.40 |
| WNT1-inducible-signaling pathway protein 1                             | WISP-1  | 9.65  |
| Protein Wnt-9a                                                         | WNT9A   | 9.89  |
| NEDD4-like E3 ubiquitin-protein ligase                                 | WWP2    | 14.96 |
| Eukaryotic translation initiation factor 4E-binding protein 1          | 4E-BP1  | 12.16 |
| 5'-nucleotidase                                                        | 5'-NT   | 6.33  |
| Lymphotactin                                                           | XCL1    | 5.34  |

|                                                  |         |       |
|--------------------------------------------------|---------|-------|
| Glycoprotein Xg                                  | XG      | 13.04 |
| Xaa-Pro aminopeptidase 2                         | XPNPEP2 | 12.41 |
| Tyrosine-protein kinase Yes                      | YES1    | 23.83 |
| Zinc finger and BTB domain-containing protein 16 | ZBTB16  | 8.54  |
| Zinc finger and BTB domain-containing protein 17 | ZBTB17  | 17.57 |

---

Abbreviation: CV, coefficient of variation.

The proteins with more than 30% coefficient variation are marked in grey.

**Table S2.** The inter-assay coefficient of variation for the 27 proteins tested in the validation set.

| <b>Proteins</b>                                                | <b>Gene</b> | <b>CV</b> |
|----------------------------------------------------------------|-------------|-----------|
| Disintegrin and metalloproteinase domain-containing protein 22 | ADAM22      | 9.74      |
| Anterior gradient protein 3                                    | AGR3        | 9.17      |
| Beta-nerve growth factor                                       | Beta-NGF    | 13.05     |
| Soluble calcium-activated nucleotidase 1                       | CANT1       | 13.34     |
| Caspase-8                                                      | CASP-8      | 4.72      |
| B-cell antigen receptor complex-associated protein beta chain  | CD79B       | 9.72      |
| Cadherin-17                                                    | CDH17       | 15.58     |
| CMRF35-like molecule 1                                         | CLM-1       | 19.67     |
| Cytotoxic and regulatory T-cell molecule                       | CRTAM       | 10.45     |
| Dipeptidyl peptidase 1                                         | CTSC        | 4.87      |
| Epithelial discoidin domain-containing receptor 1              | DDR1        | 10.69     |
| Ephrin-A4                                                      | EFNA4       | 11.31     |
| Ephrin type-B receptor 6                                       | EPHB6       | 9.51      |
| Fatty acid-binding protein 9                                   | FABP9       | 15.99     |
| Leucine-rich repeat transmembrane protein FLRT2                | FLRT2       | 17.13     |
| Heat shock 27 kDa protein                                      | HSP-27      | 17.17     |
| Endoplasmic                                                    | HSP90B1     | 24.22     |
| Interleukin-6 receptor subunit alpha                           | IL-6RA      | 11.62     |
| Leukotriene A-4 hydrolase                                      | LTA4H       | 17.09     |
| Matrilin-3                                                     | MATN3       | 10.90     |
| Natural cytotoxicity triggering receptor 1                     | NCR1        | 11.85     |
| SLAM family member 8                                           | SLAMF8      | 16.91     |
| Serine protease inhibitor Kazal-type 5                         | SPINK5      | 6.91      |
| Transferrin receptor protein 1                                 | TR          | 11.61     |
| TNF-related activation-induced cytokine                        | TRANCE      | 12.15     |
| Netrin receptor UNC5C <sup>#</sup>                             | UNC5C       | -         |
| Wiskott-Aldrich syndrome protein                               | WAS         | 14.05     |

Abbreviation: CV, coefficient of variation.

<sup>#</sup> UNC5C was not included in the Olink Explore 1536 assay in validation set.

**Table S3.** The comparison of host characteristics between the individuals involved in the discovery and validation set.

| Characteristics                                          | Discovery, No. (%)<br>(n=196) | Validation, No. (%)<br>(n=120) | P     |
|----------------------------------------------------------|-------------------------------|--------------------------------|-------|
| Age at blood draw, mean (SD), y                          | 59.1 (8.8)                    | 60.1 (8.7)                     | 0.316 |
| Age at diagnosis, mean (SD), y                           | 64.8 (8.5)                    | 65.6 (8.8)                     | 0.579 |
| Age interval (diagnose-blood draw), mean (SD), y         | 5.6 (2.4)                     | 5.5 (2.5)                      | 0.832 |
| BMI, mean (SD), kg/m <sup>2</sup>                        | 24.4 (2.9)                    | 25.2 (4.0)                     | 0.247 |
| WHR, mean (SD),                                          | 0.8 (0.1)                     | 0.8 (0.1)                      | 0.631 |
| Family income, %                                         |                               |                                |       |
| <10,000RMB                                               | 42 (21.4)                     | 36 (30.0)                      | 0.046 |
| 10,000RMB-                                               | 82 (41.8)                     | 43 (35.8)                      |       |
| 20,000RMB-                                               | 41 (20.9)                     | 32 (26.7)                      |       |
| ≥30,000RMB                                               | 31 (15.8)                     | 9 (7.5)                        |       |
| Educational attainment, %                                |                               |                                |       |
| ≤Elementary school                                       | 77 (39.3)                     | 52 (43.3)                      | 0.456 |
| Middle school                                            | 53 (27.0)                     | 37 (30.8)                      |       |
| High school                                              | 39 (19.9)                     | 16 (13.3)                      |       |
| ≥College                                                 | 27 (13.8)                     | 15 (12.5)                      |       |
| Ever smokers, %                                          | 4 (2.0)                       | 8 (6.7)                        | 0.074 |
| Ever drinkers, %                                         | 1 (0.5)                       | 3 (2.5)                        | 0.309 |
| Physical activity, MET-hrs/day/yr                        | 0.9 (1.5)                     | 0.9 (1.5)                      | 0.957 |
| Family history of adenomatous polyposis of colorectum, % | 1 (0.5)                       | 0 (0.0)                        | 1.000 |
| Family history of colorectal cancer, %                   | 4 (2.0)                       | 2 (1.7)                        | 1.000 |
| Current aspirin use, %                                   | 7 (3.6)                       | 5 (4.2)                        | 1.000 |
| Current peptic ulcer medication use, %                   | 7 (3.6)                       | 3 (2.5)                        | 0.844 |
| Ulcerative colitis, %                                    | 1 (0.5)                       | 1 (0.8)                        | 1.000 |
| Diabetes, %                                              | 18 (9.2)                      | 9 (7.5)                        | 0.755 |
| Colorectal polyp, %                                      | 3 (1.5)                       | 2 (1.7)                        | 1.000 |
| Calcium supply, %                                        | 37 (18.9)                     | 37 (30.8)                      | 0.022 |
| Total energy, mean (SD), Kcal                            | 1675.1 (411.6)                | 1628.2 (398.0)                 | 0.316 |
| Red meat, mean (SD), g/day/1000Kcal                      | 29.8 (20.5)                   | 25.7 (17.2)                    | 0.055 |
| Fat, mean (SD), g/day/1000Kcal                           | 17.7 (6.1)                    | 15.8 (5.5)                     | 0.004 |

Abbreviation: BMI, body mass index; WHR, waist-to-hip ratio.

**Table S4.** The associations between CRC risk and selected dichotomized protein markers.

| Proteins             | Discovery |       |                  |       | Validation |       |                   |                       |
|----------------------|-----------|-------|------------------|-------|------------|-------|-------------------|-----------------------|
|                      | controls  | cases | OR (95% CI) *    | P     | controls   | cases | OR (95%CI) *      | P                     |
| HSP90B1 <sup>†</sup> | 80        | 68    | Ref              |       | 30         | 32    | Ref               |                       |
|                      | 18        | 30    | 2.57 (1.19-5.57) | 0.017 | 30         | 28    | 0.90 (0.37-2.20)  | 0.819                 |
| LTA4H <sup>†</sup>   | 74        | 52    | Ref              |       | 30         | 11    | Ref               |                       |
|                      | 24        | 46    | 2.55 (1.30-5.02) | 0.006 | 30         | 49    | 7.40 (2.11-25.93) | 1.76×10 <sup>-3</sup> |

\*OR was obtained from conditional logistic regression adjusted for age, educational level, and body mass index.

<sup>†</sup>The dichotomous cutoffs of HSP90B1 were 0.74428 and -0.89045 in discovery and validation phase, respectively.

<sup>†</sup>The dichotomous cutoffs of LTA4H were 0.71740 and 1.46485 in discovery and validation phase, respectively.
